# Supplementary material for: Staphylococcus aureus Extracellular Vesicles: A Story of Toxicity and the Stress of 2020
Source: MDPI journal article supplement (doi:10.3390/toxins13020075), 2021-01-20
Supplement: s1 [file s1]

# Supplementary Materials: *Staphylococcus aureus* Extracellular Vesicles: A Story of Toxicity and the Stress of 2020

Xiaogang Wang, Paul F. Koffi, Olivia F. English and Jean C. Lee

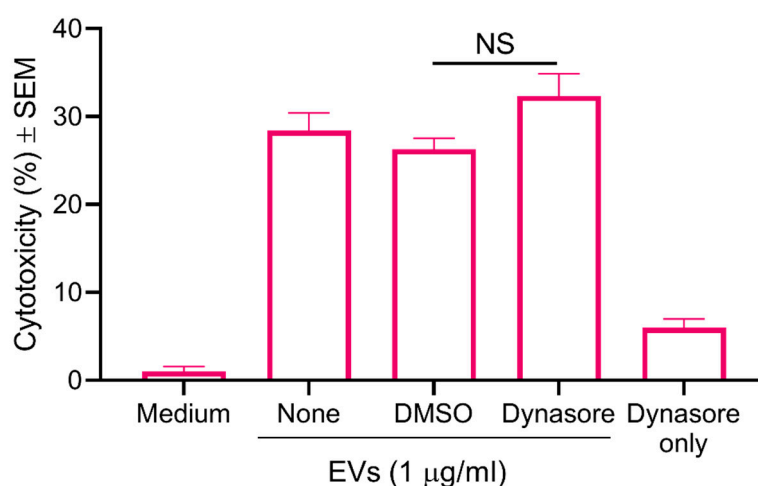

**Figure S1.** Blockage of dynamin-dependent endocytosis did not abrogate the cytotoxicity of *S. aureus* EVs toward differentiated THP-1 macrophages. Cytotoxicity was measured by release of LDH in culture supernatants of differentiated THP-1 cells that were treated with the dynamin inhibitor dynasore (40  $\mu$ M) or DMSO for 1 h prior to incubation for 4 h with 1  $\mu$ g/ml *S. aureus* EVs. A One-way ANOVA with Dunnett's multiple comparison test was used for statistical analysis. NS, Not significant.

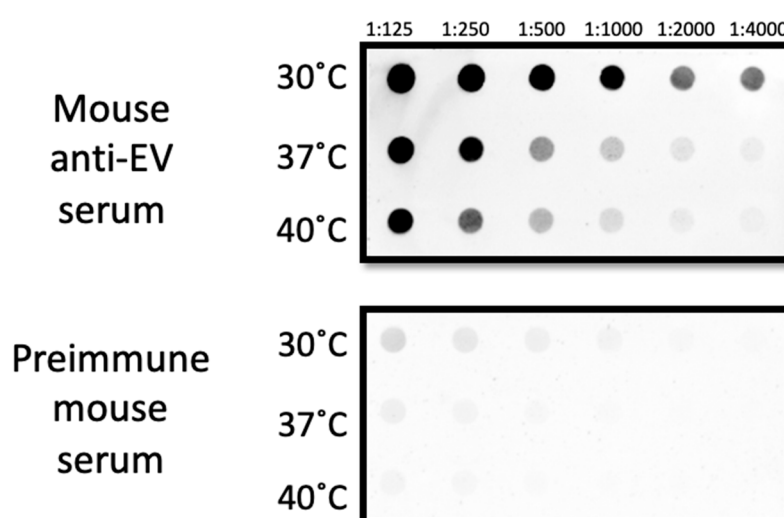

**Figure S2.** Control dot immunoblot of EVs generated from cultures incubated at different temperatures. *S. aureus* was cultivated in 100 ml TSB at the indicated temperatures until an OD of 1 was achieved. Two-fold serial dilutions of EV samples isolated from different cultures were probed with pooled serum from mice immunized with *S. aureus* EVs or preimmune normal mouse serum diluted 1:1000.

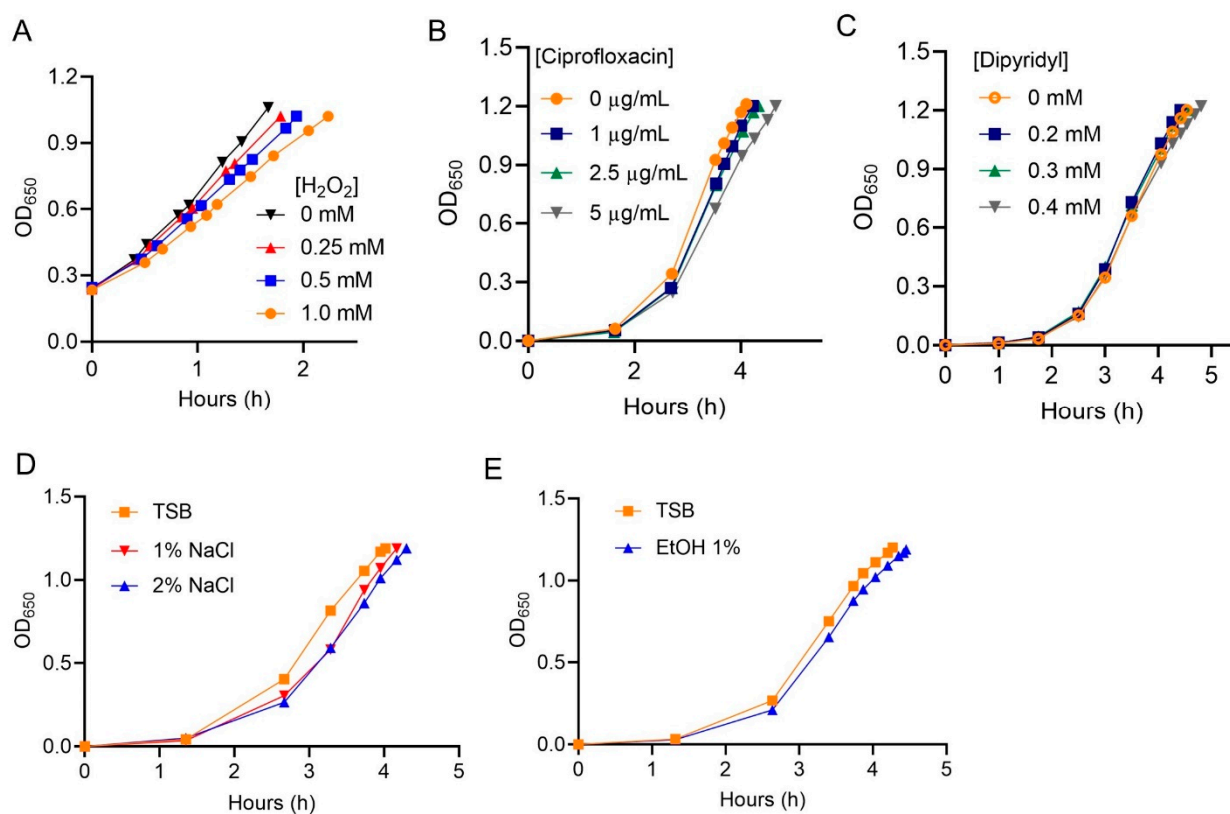

**Figure S3.** Growth curves of *S. aureus* JE2 in TSB medium in the presence or absence of indicated concentrations of (A) H<sub>2</sub>O<sub>2</sub>, (B) ciprofloxacin, (C) 2,2-dipyridyl, (D) NaCl, or (E) ethanol.

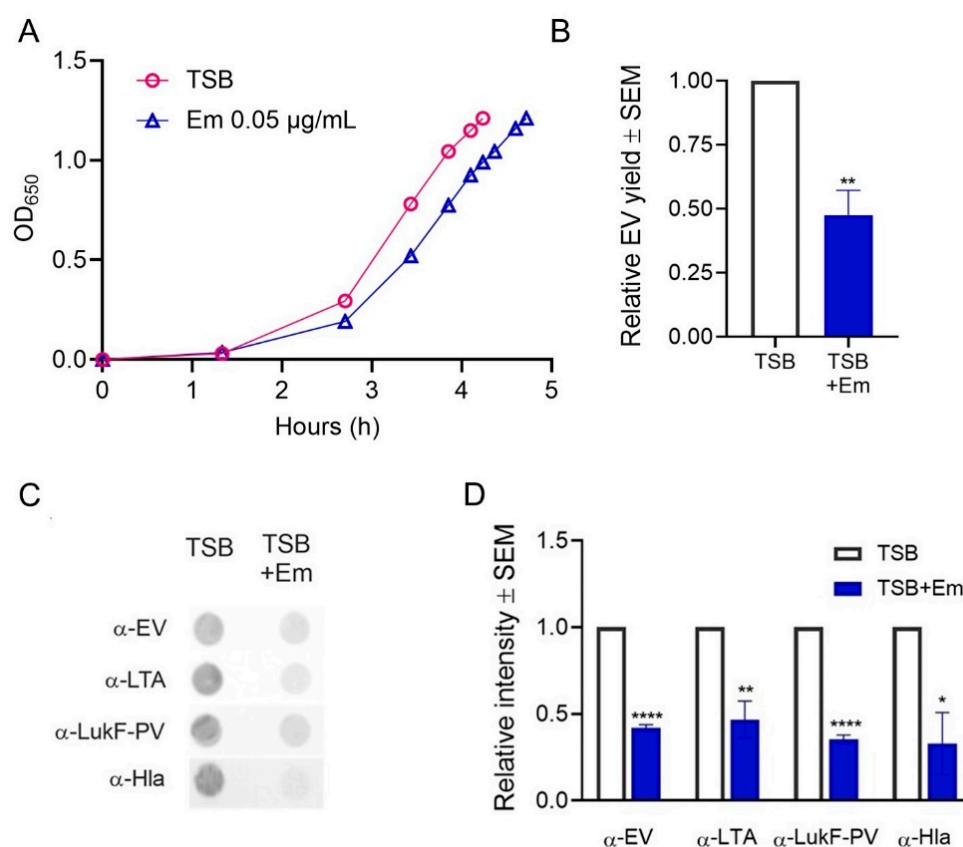

**Figure S4.** The effect of erythromycin on *S. aureus* EV production. **(A)** *S. aureus* was cultivated in 100 ml TSB with or without 0.05 µg/ml of erythromycin (Em) until an OD of 1.2 was achieved. **(B)** EV production was evaluated by quantification of relative EV protein yield or **(C)** by dot immunoblots of EV suspensions probed with indicated antibodies. Dot blots were performed at least three times, and a representative image is presented. **(D)** Relative intensity of dot blot images pooled from 3 independent experiments are shown. \* $P < 0.05$ , \*\*  $P < 0.01$ , \*\*\*\*  $P < 0.0001$ , as determined by the Student  $t$  test.
